# Supplementary material for: Treatment Discontinuation, Adherence, and Real-World Effectiveness Among Patients Treated with Ledipasvir/Sofosbuvir in the United States
Source: Springer Nature journal article supplement (doi:10.1007/s40121-017-0163-0), 2017-07-04
Supplement: MOESM1 [file 12843902]

Supplementary Table 1. Comparison of Baseline Demographic and Clinical Characteristics Among Patients With and Without SVR Data who Completed Treatment

| <b>Demographics</b>                                            | <b>SVR Data Available (n=85)</b> | <b>SVR Data Unavailable (n=982)</b> | <b>p-value</b> |
|----------------------------------------------------------------|----------------------------------|-------------------------------------|----------------|
| <b>Age, mean (SD)</b>                                          | 60.32 (10.1)                     | 60.31 (9.1)                         | 0.991          |
| <b>Male Gender, n (%)</b>                                      | 58 (68.2)                        | 648 (66.0)                          | 0.721          |
| <b>Insurance type, n (%)</b>                                   |                                  |                                     |                |
| Commercial                                                     | 42 (49.4)                        | 486 (49.5)                          | 1.000          |
| Medicare Advantage                                             | 43 (50.6)                        | 496 (50.5)                          | 1.000          |
| <b>Pre-index observation period (continuous months), n (%)</b> |                                  |                                     |                |
| ≥12–<18                                                        | 14 (16.5)                        | 144 (14.7)                          | 0.634          |
| ≥18–<24                                                        | 15 (17.7)                        | 104 (10.6)                          | 0.070          |
| ≥24–<36                                                        | 14 (16.5)                        | 210 (21.4)                          | 0.332          |
| ≥36                                                            | 42 (49.4)                        | 524 (53.5)                          | 0.499          |
| <b>Treatment status, n (%)</b>                                 |                                  |                                     |                |
| Treatment naïve                                                | 75 (88.2)                        | 839 (85.4)                          | 0.628          |
| Treatment experienced                                          | 10 (11.8)                        | 143 (14.6)                          | 0.628          |
| <b>Liver disease severity, n (%)</b>                           |                                  |                                     |                |
| Non-cirrhotic disease                                          | 55 (64.7)                        | 500 (50.9)                          | 0.017          |
| Cirrhosis                                                      | 7 (8.2)                          | 178 (18.1)                          | 0.024          |
| Decompensated cirrhosis/end-stage liver disease                | 23 (27.1)                        | 304 (31.0)                          | 0.540          |
| <b>Quan-Charlson comorbidity score, n (%)</b>                  |                                  |                                     |                |
| 0                                                              | 2 (2.4)                          | 29 (3.0)                            | 1.000          |
| 1-2                                                            | 38 (44.7)                        | 332 (33.8)                          | 0.057          |
| 3-4                                                            | 24 (28.2)                        | 319 (32.5)                          | 0.469          |
| 5+                                                             | 21 (24.7)                        | 302 (30.8)                          | 0.270          |

**Pre-index conditions/events, n (%)**

|                                    |                  |                   |       |
|------------------------------------|------------------|-------------------|-------|
| Chronic kidney disease             | 5 (5.9)          | 59 (6.0)          | 1.000 |
| HIV                                | 6 (7.1)          | 86 (8.8)          | 0.840 |
| Liver transplant                   | 5 (5.9)          | 34 (3.5)          | 0.230 |
| Drug abuse                         | 13 (15.3)        | 200 (20.4)        | 0.322 |
| Anxiety                            | 28 (32.9)        | 305 (31.1)        | 0.716 |
| Depression                         | 27 (31.8)        | 343 (34.9)        | 0.635 |
| <b>Genotype<sup>*</sup>, n (%)</b> | (Available n=58) | (Available n=419) |       |
| 1                                  | 58 (100.0)       | 414 (98.8)        | 1.000 |
| Other                              | 0 (0.0.)         | 5 (1.2)           | 1.000 |

---
